# Supplementary material
Source: publisher figshare collection journal article supplement (https://sage.figshare.com/ndownloader/files/20333433)
Supplement: Supplementary file 1 [file 20333433]

**Supplementary figure S4. Change in the route of administration**

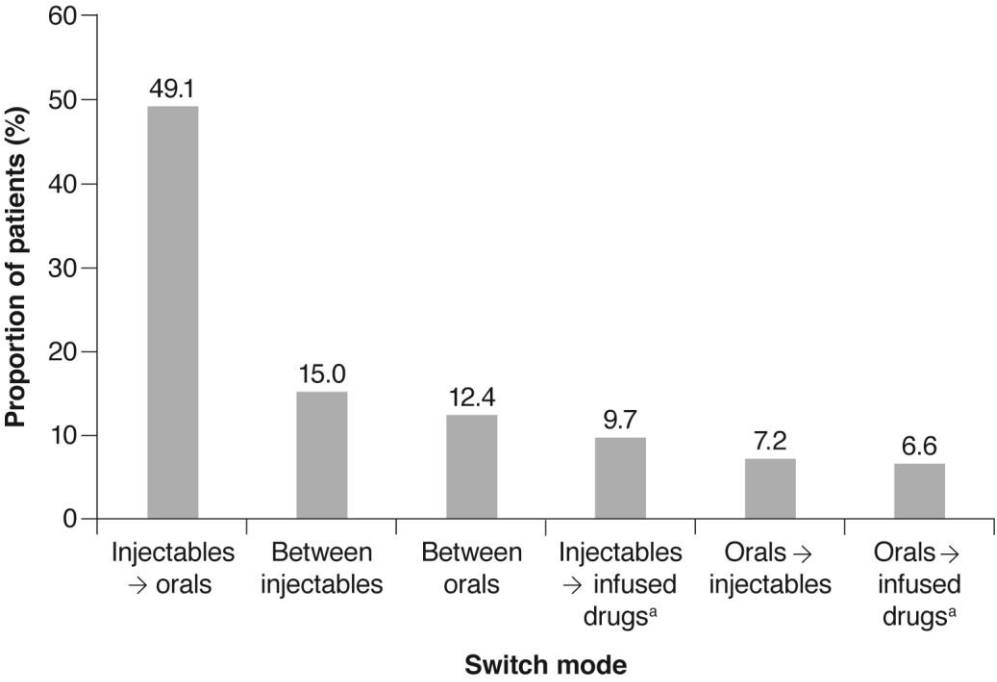

<sup>a</sup>Infused drugs include monoclonal antibodies and mitoxantrone.
